# Supplementary material for: Reversible electrodeposition and stripping of magnesium from solvate ionic liquid–tetrabutylammonium chloride mixtures
Source: Royal Society of Chemistry journal article supplement (doi:10.1039/d0ra08187f), 2020-01-01
Supplement: d0ra08187f1.pdf [file d0ra08187f1.pdf]

**Reversible electrodeposition and stripping of magnesium from  
solvate ionic liquid–tetrabutylammonium chloride mixtures**

Pieter Geysens,<sup>a</sup> Jan Fransaer<sup>b</sup> and Koen Binnemans<sup>a\*</sup>

<sup>a</sup>Department of Chemistry, KU Leuven, Celestijnenlaan 200F, B-3001 Leuven, Belgium.

<sup>b</sup>Department of Materials Engineering, KU Leuven, Kasteelpark Arenberg 44, B-3001 Leuven, Belgium.

*Electronic Supplementary Information (ESI)*

## Supplementary figures

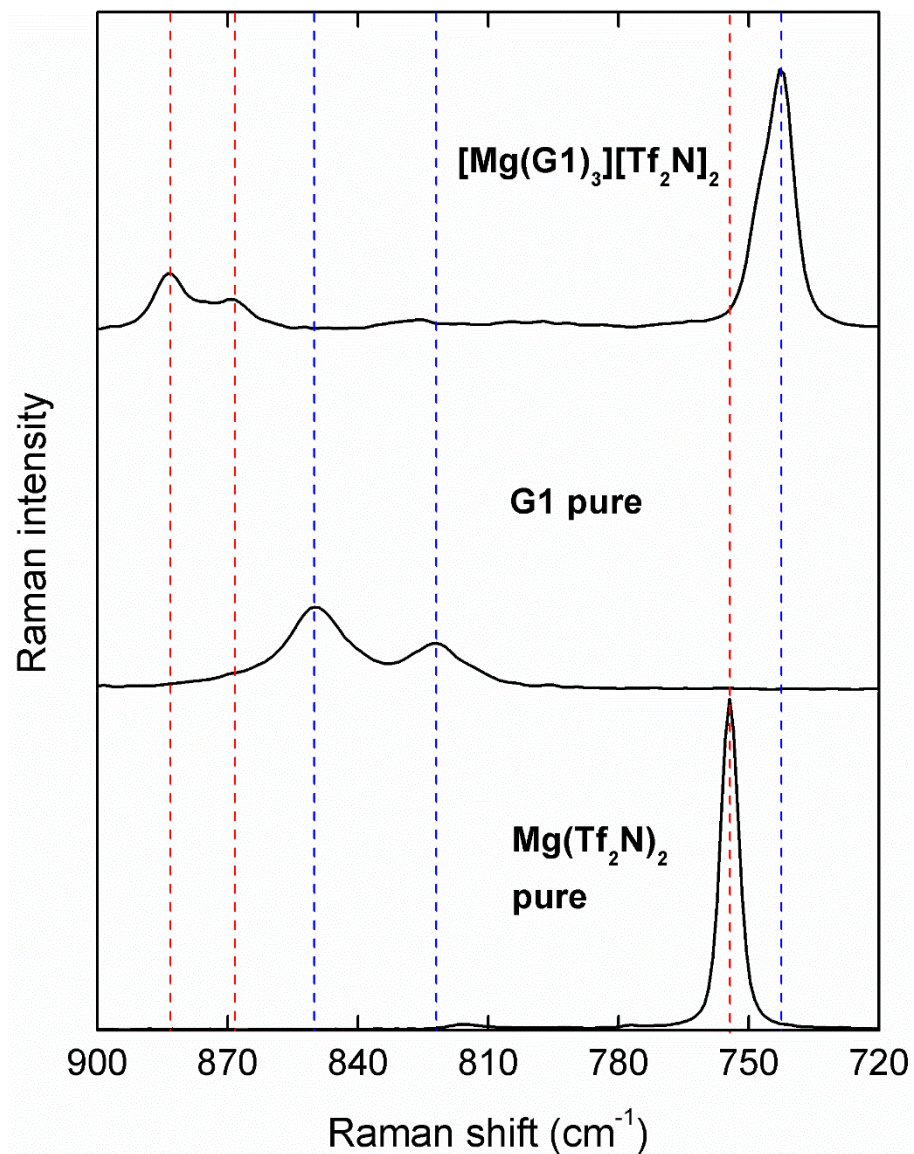

**Figure S1.** Raman spectra of [Mg(G1)<sub>3</sub>][Tf<sub>2</sub>N]<sub>2</sub> (top), pure G1 (middle), and Mg(Tf<sub>2</sub>N)<sub>2</sub> (bottom) in the range from 900 cm<sup>-1</sup> to 720 cm<sup>-1</sup>. The red and blue dashed lines are a visual aid to show the bands corresponding to coordinated and uncoordinated ligands/anions, respectively.

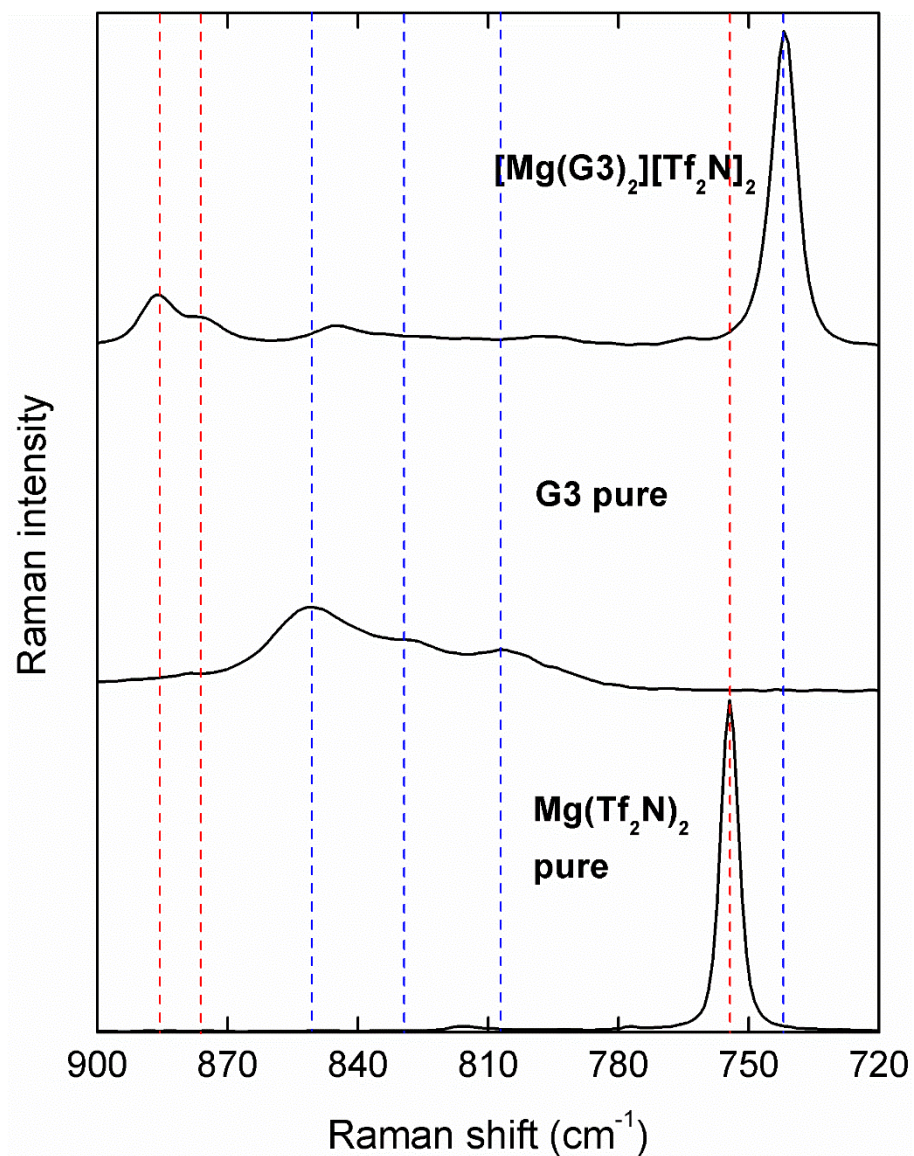

**Figure S2.** Raman spectra of [Mg(G3)<sub>2</sub>][Tf<sub>2</sub>N]<sub>2</sub> (top), pure G3 (middle), and Mg(Tf<sub>2</sub>N)<sub>2</sub> (bottom) in the range from 900 cm<sup>-1</sup> to 720 cm<sup>-1</sup>. The red and blue dashed lines are a visual aid to show the bands corresponding to coordinated and uncoordinated ligands/anions, respectively.

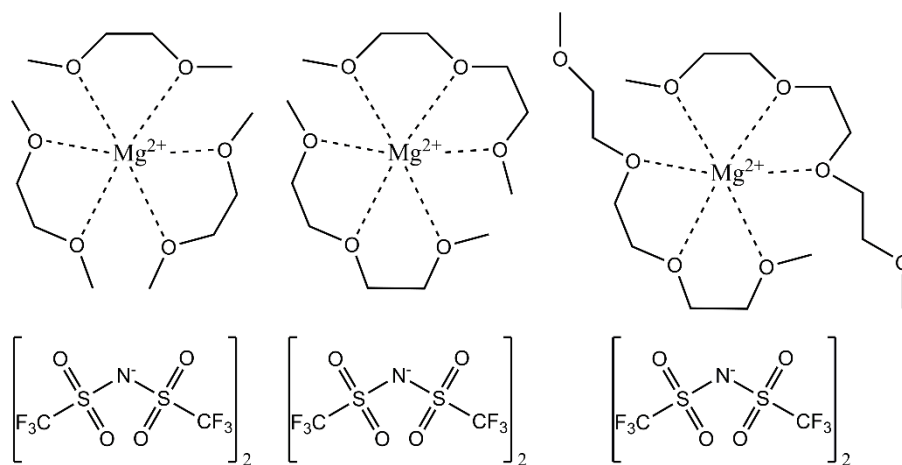

**Figure S3.** Schematic representation of the proposed solvent separated ion pair (SSIP) solvate structures of  $[\text{Mg}(\text{G1})_3][\text{Tf}_2\text{N}]_2$  (left),  $[\text{Mg}(\text{G2})_2][\text{Tf}_2\text{N}]_2$  (middle), and  $[\text{Mg}(\text{G3})_2][\text{Tf}_2\text{N}]_2$  (right).

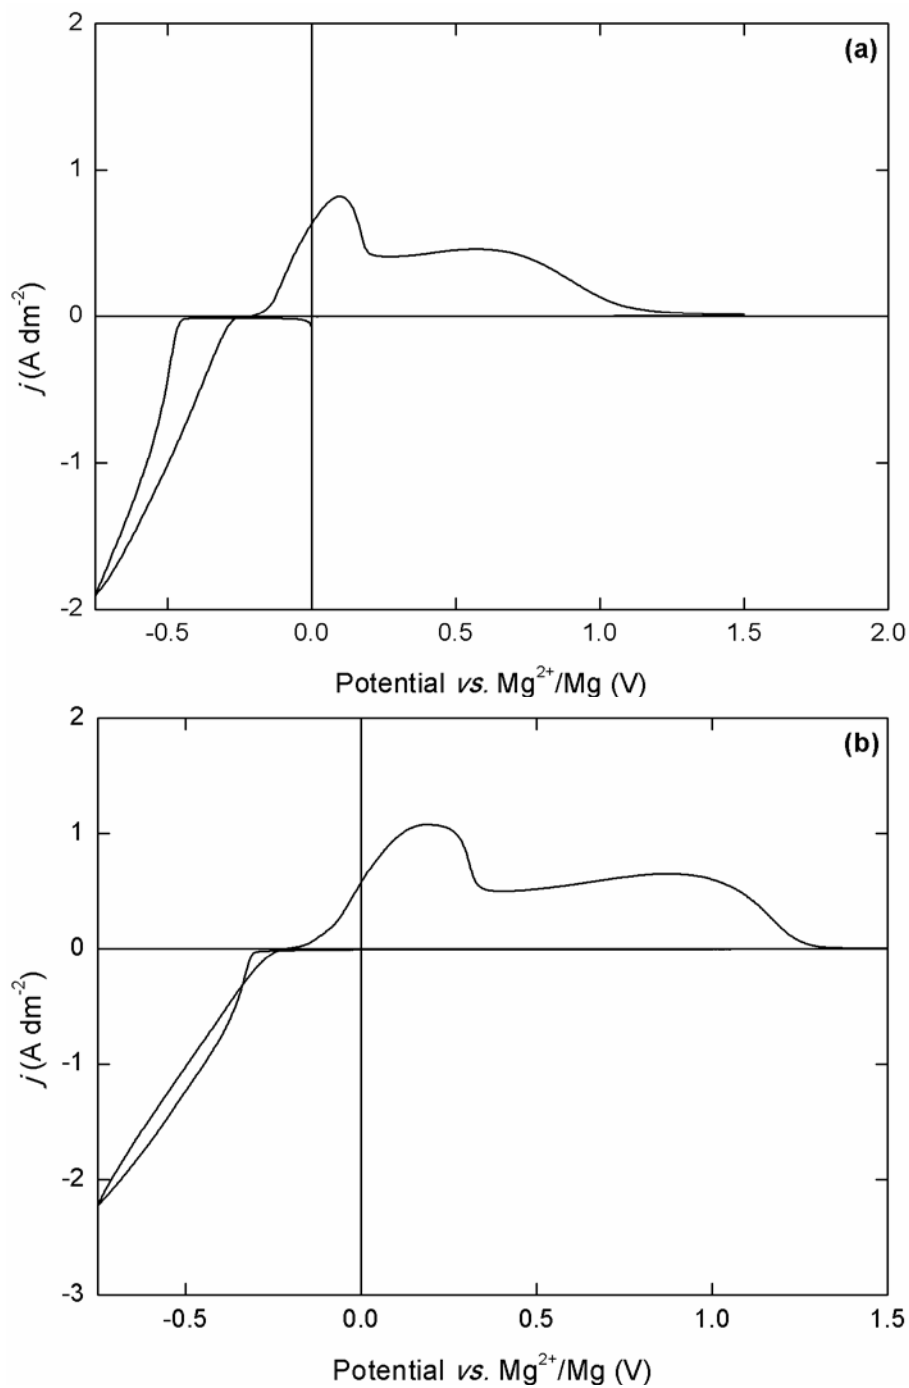

**Figure S4.** Cyclic voltammograms (first cycle) of [Mg(G1)<sub>3</sub>][Tf<sub>2</sub>N]<sub>2</sub>:TBACl 1:1 (top), and [Mg(G3)<sub>2</sub>][Tf<sub>2</sub>N]<sub>2</sub>:TBACl 1:1 (bottom), recorded on a platinum disk working electrode at 80 °C. The counter and reference electrode was magnesium and the scan rate was 50 mV s<sup>-1</sup>. Due to the use of a magnesium pseudo-reference electrode, the potential is shifted to the negative side, as illustrated by the negative potential of the stripping peak onset.

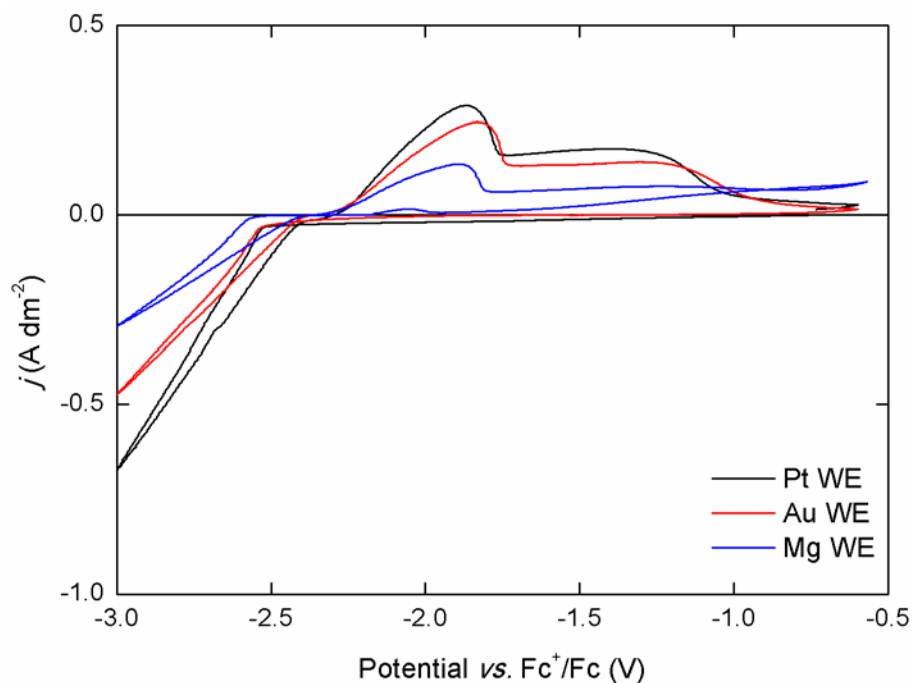

**Figure S5.** Cyclic voltammograms of [Mg(G3)<sub>2</sub>][Tf<sub>2</sub>N]<sub>2</sub>:TBACl 1:1, recorded on a platinum-coated silicon wafer (black curve), a gold-coated silicon wafer (red curve) or magnesium metal strip (blue curve) at 80 °C. The reference electrode was Fc<sup>+</sup>/Fc in [BMP][Tf<sub>2</sub>N], the counter electrode was magnesium metal and the scan rate was 50 mV s<sup>-1</sup>.

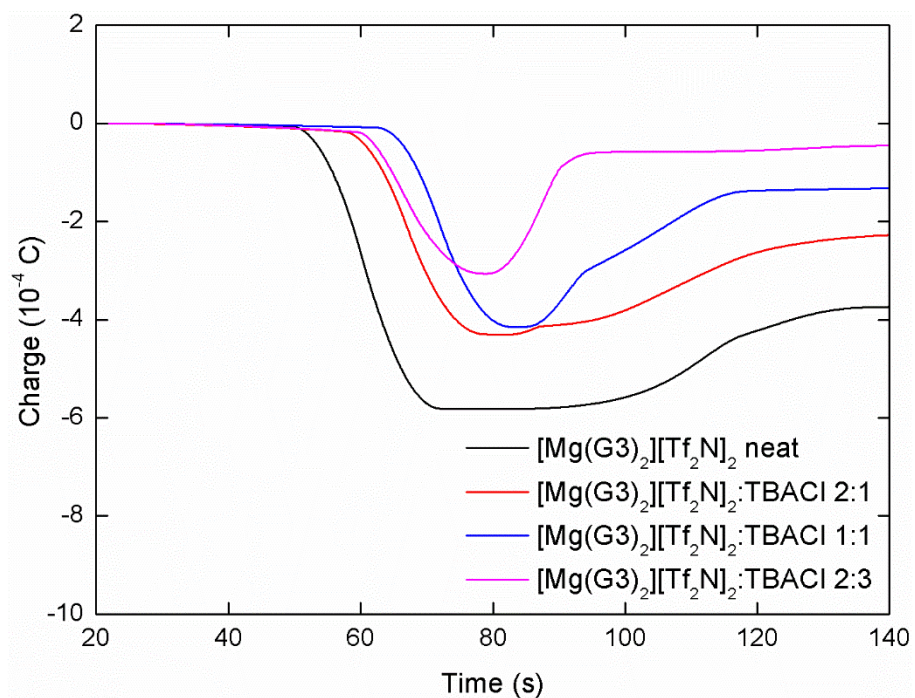

**Figure S6.** Charge *vs.* time plots accompanying cyclic voltammograms (first cycle) of  $[\text{Mg}(\text{G3})_2][\text{Tf}_2\text{N}]_2$ :TBACl in various ratios, recorded on a platinum disk working electrode at 80 °C, as depicted in Figure 6a.

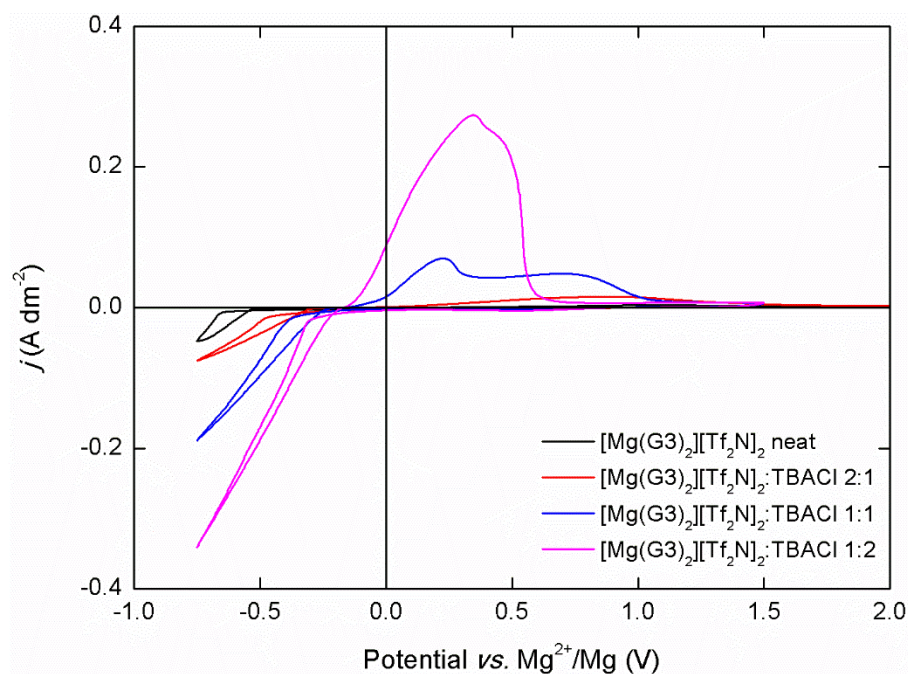

**Figure S7.** Cyclic voltammograms of [Mg(G3)<sub>2</sub>][Tf<sub>2</sub>N]<sub>2</sub>:TBACl in various ratios, recorded on a platinum disk electrode. The pseudo-reference and counter electrodes were magnesium metal and the scan rate was 50 mV s<sup>-1</sup>.
